# Supplementary material for: Multiplex imaging relates quantal glutamate release to presynaptic Ca2+ homeostasis at multiple synapses in situ
Source: PubMed Central journal article supplement (PMC6441074; doi:10.1038/s41467-019-09216-8), 2019-03-29
Supplement: 41467_2019_9216_MOESM1_ESM.pdf [file 41467_2019_9216_MOESM1_ESM.pdf]

**Multiplex imaging relates quantal glutamate release to presynaptic  
Ca<sup>2+</sup> homeostasis at multiple synapses *in situ***

by Jensen *et al.*

**Supplementary Information**

## Supplementary Figures

**a**

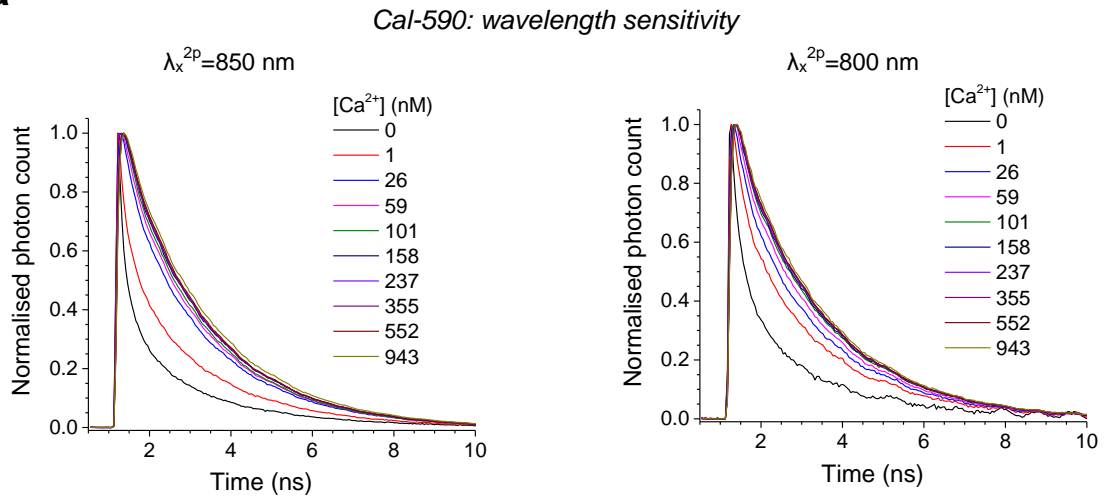

**b**

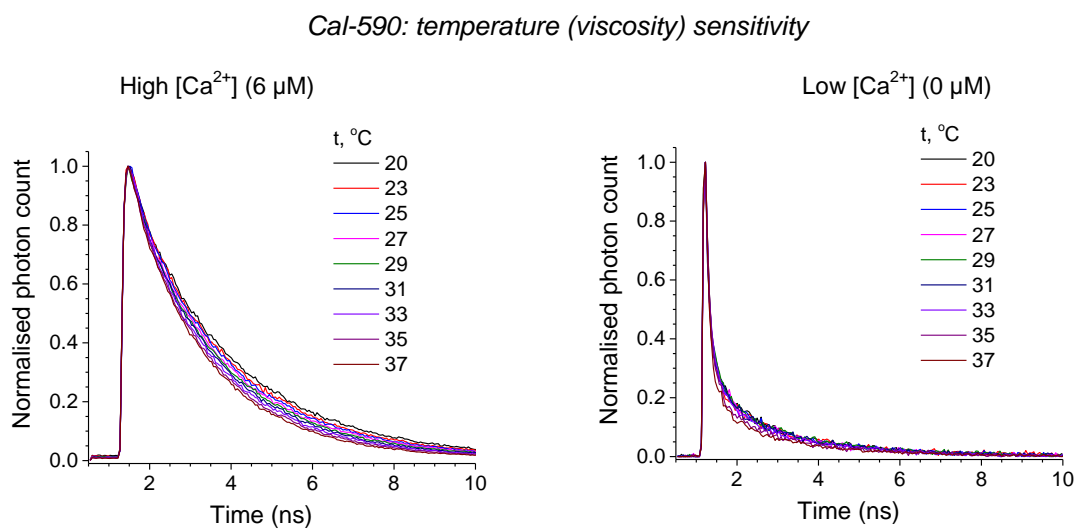

**c**

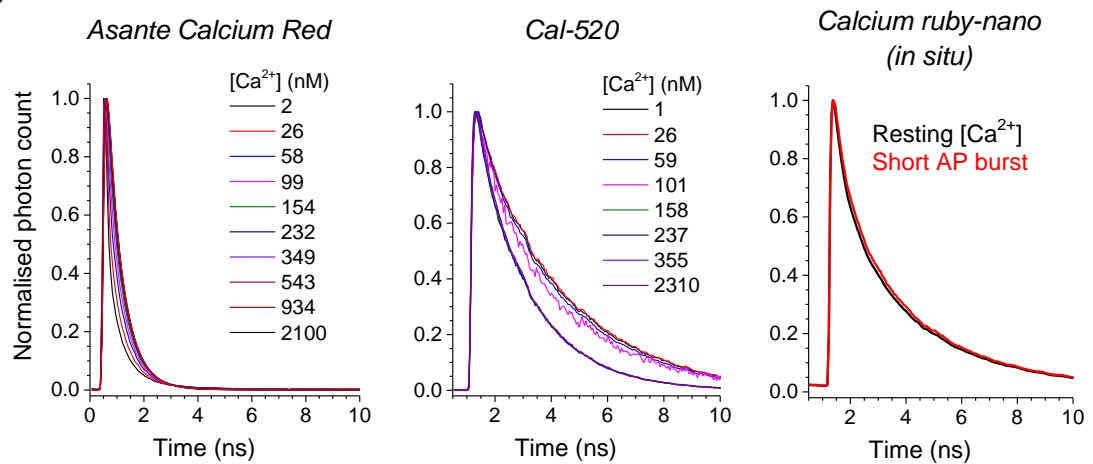

**Supplementary Figure 1. Cal-590 fluorescence lifetime sensitivity to excitation wavelength and temperature / viscosity.**

**(a)** Cal-590 lifetime sensitivity to  $[Ca^{2+}]$  under different two-photon excitation wavelength, 850 nm and 800 nm, as indicated (temperature 33°C). The detected sensitivity range for 0-200 nM  $[Ca^{2+}]$  is narrower than that for the optimal excitation wavelength of 910 nm (Fig. 1a-b).

**(b)** Fluorescence decay of Cal-590 under saturating (left) and zero-clamped (right)  $[Ca^{2+}]$ , over the range of experimentally relevant temperatures, as indicated (viscosity).

**(c)** Testing the fluorescence decay  $[Ca^{2+}]$  sensitivity for Asante Calcium Red, Cal-520, and ruby-nano, as indicated: the first two were evaluated using the standard FLIM calibration procedure as in **a-b** whereas Calcium ruby-nano was tested *in situ* (axonal bouton, CA3 pyramidal cell, organotypic hippocampal slices), by comparing its fluorescence decay in resting conditions (black) and during peak intensity response to a burst of four action potentials (at 20 Hz, red), as indicated; recordings at  $\lambda_x^{2p} = 910$  nm, 33°C.

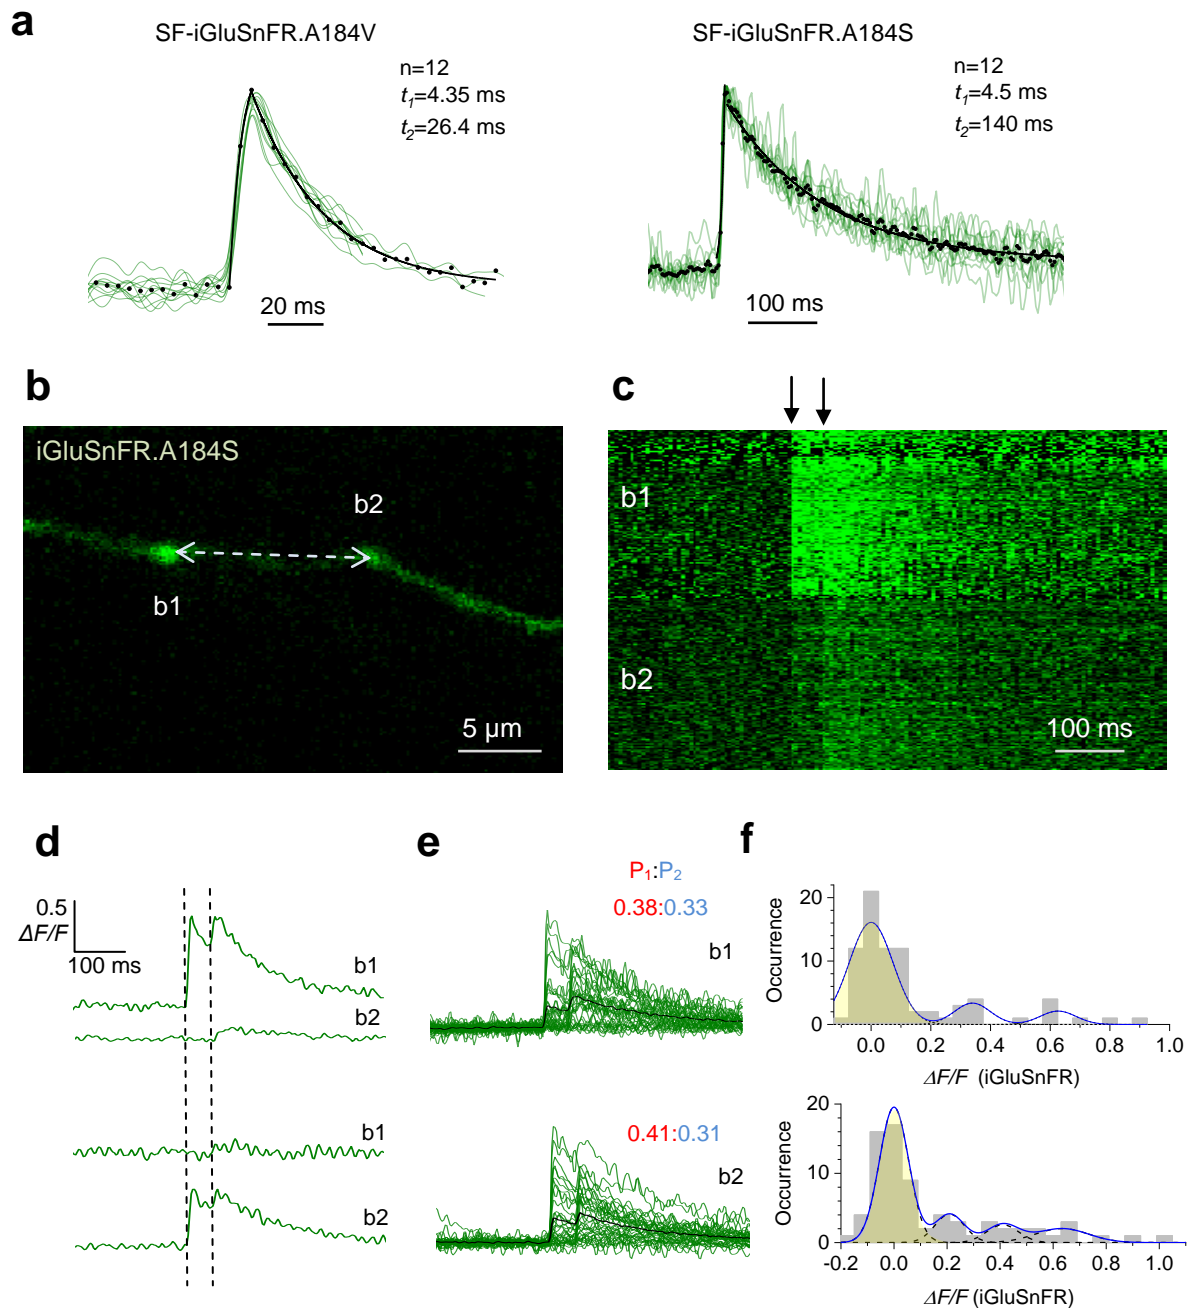

**Supplementary Figure 2. Simultaneous multi-synapse imaging of quantal glutamate release with iGluSnFR.A184S.**

**(a)** Comparative assessment of the binding (fluorescence) kinetics for SF-iGluSnFR.A184V and SF-iGluSnFR.A184S variants, as indicated, upon quasi-instantaneous glutamate release; green traces, normalised single-AP-evoked fluorescence responses recorded in individual boutons of CA3 pyramidal cell axons traced to area CA1; dots, all-trace average; black line, best-fit double-exponent approximation:  $t_1$ , rise constant;  $t_2$ , decay constant;  $n$ , number of trials.

**(b)** CA3 pyramidal cell axon fragment in area CA1 showing two presynaptic boutons (b1-b2); two-headed arrow illustrates laser scan trajectory, with the scanning dwell points in the bouton centres.

**(c)** A pseudo-linescan image of SF-iGluSnFR.A184S signals recorded simultaneously (one sweep example) at two boutons shown in **a** as indicated, during somatic generation of two APs 50 ms apart (arrows); glutamate releases and failures can be seen; further detail in Fig 2b.

**(d)** Example of two consecutive recordings (top and bottom;  $\Delta F/F$  SF-iGluSnFR.A184S) from two boutons, as indicated, to illustrate no fluorescence signal cross-talk between the boutons. P1:P2, average probability of the first (red) and second (blue) release events.

**(e)** A summary of 36 trials (1 min interval) in the experiment shown in **a-b**; green traces, single-sweep SF-iGluSnFR.184S  $\Delta F/F$  intensity readout at the two bouton centres; black traces, all-sweep-average.

**(f)** Amplitude histograms (SF-iGluSnFR.184S  $\Delta F/F$  signal, first and second response counts combined; pre-pulse 8 ms baseline subtracted), with a semi-unconstrained multi-Gaussian fit (blue line, Methods) indicating peaks that correspond to estimated quantal amplitudes; the leftmost peak corresponds to zero-signal (failure; yellow shade); dotted lines, individual Gaussians; arrows, average amplitudes (including failures) of the first (red) and second (blue) glutamate response.

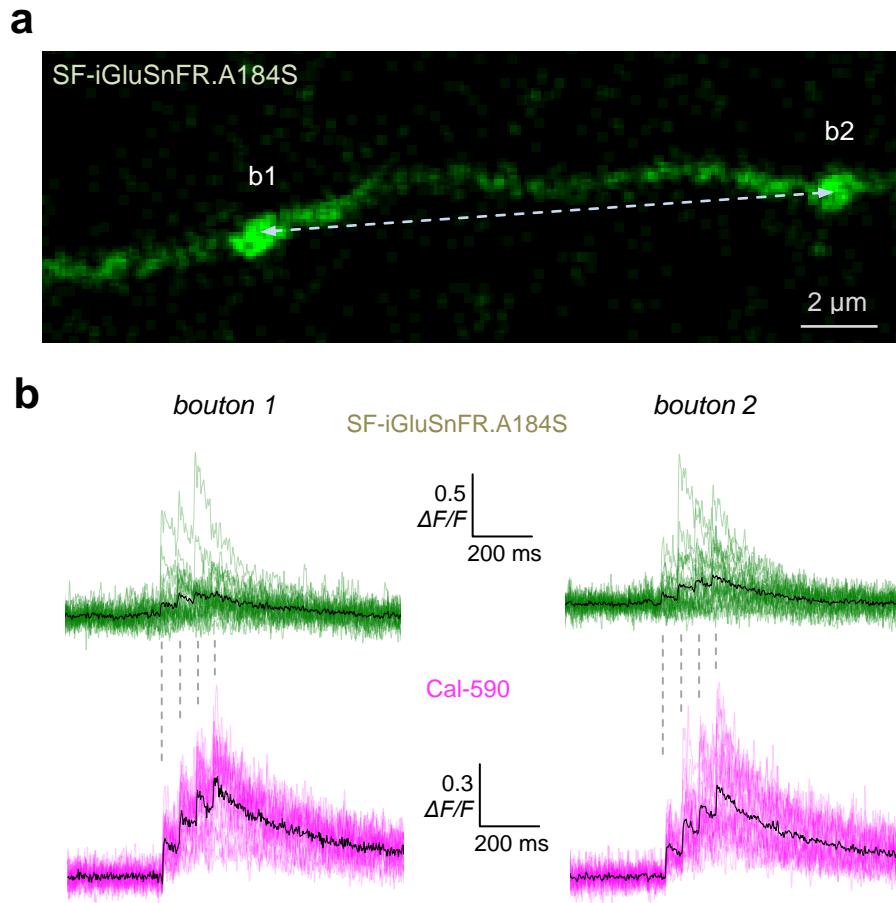

**Supplementary Figure 3. Simultaneous multi-synapse imaging of quantal glutamate release and presynaptic  $\text{Ca}^{2+}$  dynamics with SF-iGluSnFR.A184S and Cal-590.**

**(a)** CA3 pyramidal cell axon fragment in area CA1 showing two presynaptic boutons (b1-b2; green channel); two-headed arrow illustrates laser scan trajectory, with the scanning dwell points in the bouton centres.

**(b)** A summary of 24 trials (1 min interval) in the experiment shown in **a**; green and magenta traces, single-sweep SF-iGluSnFR.A184S and Cal-590  $\Delta F/F$  intensity readout at the two bouton centres; black traces, all-sweep-average.

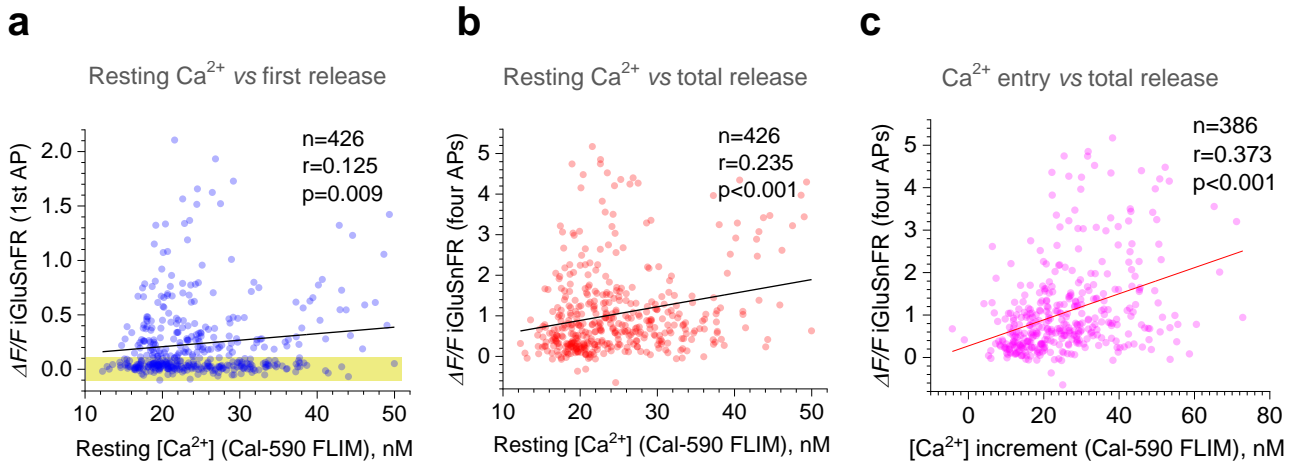

**Supplementary Figure 4. Resting presynaptic  $\text{Ca}^{2+}$  and evoked  $\text{Ca}^{2+}$  entry both control glutamate release reported by direct SF-iGluSnFR.A184V readout.**

**(a)** Glutamate release ( $\Delta F/F$  SF-iGluSnFR.A184V signal) upon first AP, plotted against resting  $[\text{Ca}^{2+}]$  (Cal-590 FLIM readout, averaged over 100 ms pre-pulse). Solid line, linear regression ( $r$ , Pearson's correlation;  $p$ , regression slope significance;  $n$ , number of events,  $N = 26$  axonal boutons recorded); yellow shade, Gaussian noise (failure response) cut-off,  $\sim 95\%$  confidence interval.

**(b)** Cumulative glutamate release upon four APs ( $\Delta F/F$  iGluSnFR signals summed, with pre-AP 8 ms baselines subtracted) plotted against presynaptic resting  $[\text{Ca}^{2+}]$  (Cal-590 FLIM readout); other notations as in a.

**(c)** Cumulative glutamate release upon four APs (as in c), plotted against cumulative  $[\text{Ca}^{2+}]$  increment (Cal-590 FLIM readout, during four APs); other notations as in a ( $N = 24$  boutons recorded).

See Fig. 4b-d for the corresponding data reporting quantal content of glutamate release.

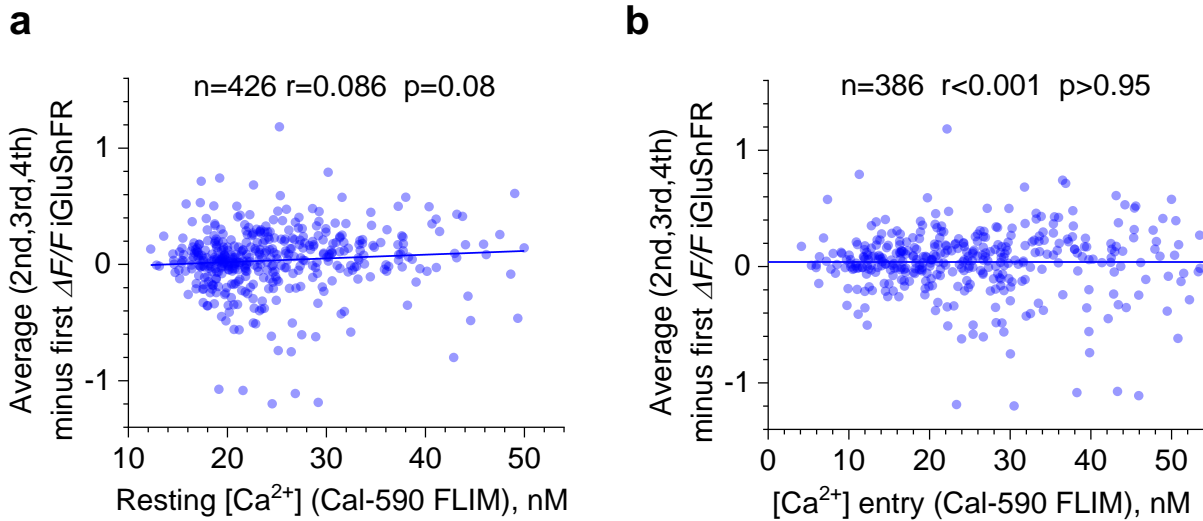

**Supplementary Figure 5. Resting presynaptic  $Ca^{2+}$  and evoked  $Ca^{2+}$  entry are not correlated with short-term plasticity (facilitation or depression) of glutamate release.**

(a) Short-term plasticity indicator calculated as the average amplitude of the 2nd, 3rd, and 4th  $\Delta F/F$  iGluSnFR signals minus the amplitude of the 1st  $\Delta F/F$  iGluSnFR signal (formula to minimise fluctuations due to release failures) plotted against presynaptic resting  $[Ca^{2+}]$  (Cal-590 FLIM readout).

(b) Short-term plasticity indicator as in **a** plotted against cumulative  $[Ca^{2+}]$  increment (Cal-590 FLIM readout, during four APs); trials recorded with only two (rather than four) APs were excluded; other notations as in **a**.



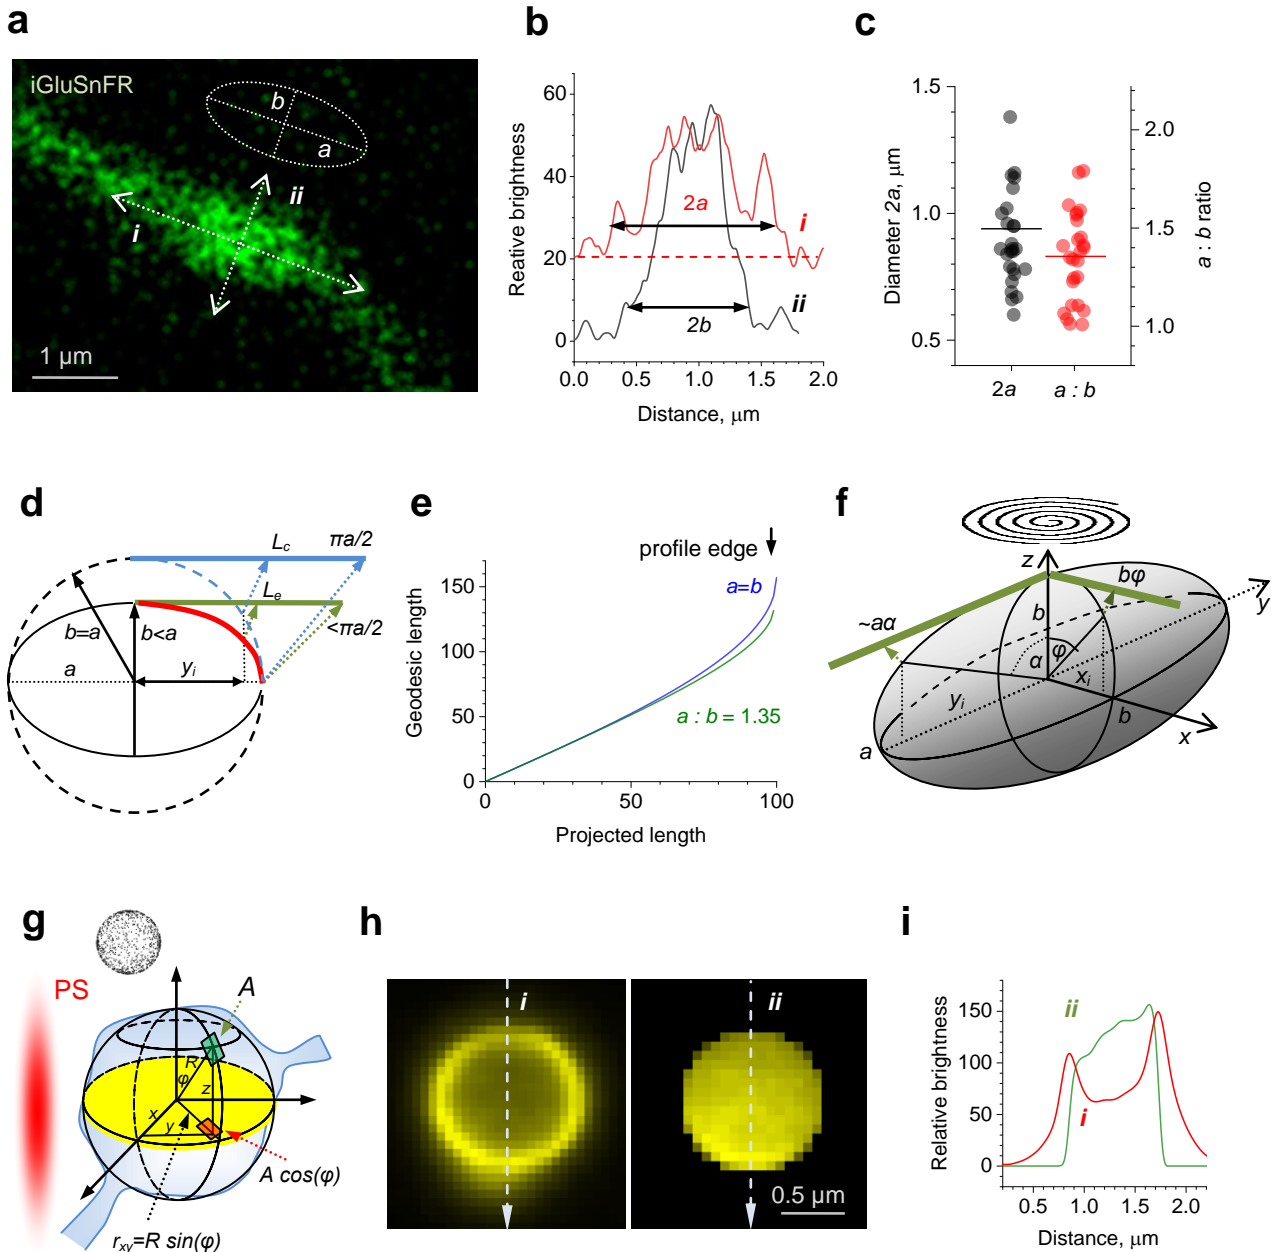

**Supplementary Figure 6. Stereological geodesic corrections for the signal spread and density on spherical or elliptical surfaces (of axonal boutons) projected onto the focal plane.**

**(a)** An axonal bouton (example) projection in the focal plane, with two profile sampling lines (*i* and *ii*) to estimate outline approximation by an ellipse (dotted oval), with *a* and *b* being major and minor axes, respectively.

**(b)** Brightness profiles along lines *i* and *ii* shown in **a**, as indicated. Two-headed arrows, effective width of the bouton along *i* and *ii* axes, to provide *a* and *b* values for the approximating ellipse, as shown. The cut-off values for *a* and *b* (arrow end

positions) correspond to  $\sim 2\text{SD}$  of the background noise; horizontal dotted line, background reflecting the adjacent axon.

**(c)** Data scatters showing  $a$  values (mean  $\pm$  SEM,  $0.59 \pm 0.02$ ) and  $a : b$  ratios ( $1.35 \pm 0.04$ ) in the recorded sample of boutons ( $n = 26$ ).

**(d)** Trigonometry diagram explaining geodesic corrections for distances on curved surfaces that are projected onto the (focal)  $x$ - $y$  plane (as in Fig. 5d). For an elliptical section with major and minor axes  $a$  and  $b$ , respectively, the projected distance  $x_i$  from the centre corresponds to the geodesic distance ( $L_e$ , green segment) which is consistently larger than that for a circular correction ( $L_c$ , blue segment).

**(e)** Comparison between  $L_e$  and  $L_c$  geodesic corrections (relative 1-100 scale), with the average  $a : b$  experimental ratio of 1.35 (as in **c**). The discrepancy between the two is small throughout the length reaching a maximum of  $\sim 15\%$  towards the projection edge (elongated tip of the ellipsoid in **d**).

**(f)** Summary schematic for geodesic correction applied to a rotational ellipsoid (approximating the axonal bouton shape) projected onto a plane. For the running coordinate  $x_i$ , the corrected geodesic distance (along the  $x$  axis) is  $b\varphi = b \arcsin(x_i/b)$  whereas for the coordinate  $y_i$ , the geodesic distance (along the  $y$  axis) is  $\sim a\alpha = a \arcsin(y_i/a)$ . Because the tornado scan (shown) is normally a circle inscribed into the bouton oval (Fig. 5e), there will be no data collected towards the tip of the ellipse, in the  $y$  direction (Fig. 5f). Thus, the  $\sim 15\%$  discrepancy between circular and elliptic corrections which is seen towards the profile edge in the  $y$  direction (seen in **e**) will be effectively void, ensuring good approximation (estimated error  $< 5\%$ ).

**(g)** Diagram illustrating stereological correction for the surface signal density on a spherical surface; inset, cartoon showing that the planar projection of spherical objects, with uniform surface distribution of fluorescence signals (dots), yields overestimated signal density towards the projection edges; red shade, approximate representation of the microscope's point-spread function (PSF). Sphere-like bouton structure is shown projecting onto the microscope focal plane (yellow). In spherical coordinates (indicated), the differential (infinitesimal) element  $A$  of the sphere surface (green quadrangle) has an area of  $r^2 \cdot \sin(\varphi) d\varphi d\theta$  whereas its projection onto the  $z=0$  plane (red quadrangle) has an area of  $r^2 \cdot \sin(\varphi) \cdot \cos(\varphi) d\varphi d\theta$ . The signal intensity in the projection is therefore boosted by factor  $1 / \cos(\varphi)$  compared to the surface intensity. Thus, applying the factor  $\cos(\varphi) = (1 - \sin^2(\varphi))^{1/2} = (1 - r_{xy}^2/r^2)^{1/2}$  to the image intensity provides the projection-corrected value.

**(h)** *Left*, focal plane projection of a nanoengineered microcapsule containing a fluorescent dye in its shell only (left)<sup>1</sup>. *Right*, the capsule shell fluorescence map corrected for the stereological bias as explained in **g**; dotted lines ( $i$ ,  $ii$ ), brightness profile sampling.

**(i)** Brightness profiles sampled in images shown in **h**, as indicated.

## Supplementary Reference

- 1 Kopach, O. *et al.* Nano-engineered microcapsules boost the treatment of persistent pain. *Drug Deliv* 25, 435-447 (2018).
